# Supplementary material for: Fine Particulate Matter Exposure and Health Impacts from Indoor Activities
Source: Hindawi journal article supplement (doi:10.1155/2023/8857446), 2023-11-21
Supplement: f2 [file 8857446.f2.pdf]

**Supporting Information: Fine particulate matter exposure and health impacts from indoor activities**

Rachna Bhoonah<sup>a\*</sup>, Alice Maury-Micolier<sup>b</sup>, Olivier Jolliet<sup>c, d</sup> and Peter Fantke<sup>c\*</sup>

<sup>a</sup>Mines Paris-PSL, CES – Center for Energy Efficiency of Systems, 60 Bd St Michel, 75006 Paris, France

<sup>b</sup>Octopus Lab, 237 Rue du Ballon, 59110 La Madeleine, France

<sup>c</sup>Quantitative Sustainability Assessment, Department of Environmental and Resource Engineering, Technical University of Denmark, Bygningstorvet 115, 2800 Kgs. Lyngby, Denmark

<sup>d</sup>Environmental Health Sciences, School of Public Health, University of Michigan, Ann Arbor, MI 48109, USA

|           |                                                                                                                                                                                                                                                                         |
|-----------|-------------------------------------------------------------------------------------------------------------------------------------------------------------------------------------------------------------------------------------------------------------------------|
| Table S1: | Effect factors ( $\mu\text{DALY}/\mu\text{g}_{\text{intake}}$ ), characterisation factors ( $\mu\text{DALY}/\mu\text{g}_{\text{emitted}}$ ) and impact scores ( $\mu\text{DALY}/\text{d}$ ) for 17 activities and 10 ventilation scenarios for <b>small</b> room volume |
| Table S2: | Effect factors ( $\mu\text{DALY}/\mu\text{g}_{\text{intake}}$ ), characterisation factors ( $\mu\text{DALY}/\mu\text{g}_{\text{emitted}}$ ) and impact scores ( $\mu\text{DALY}/\text{d}$ ) for 17 activities and 10 ventilation scenarios for <b>large</b> room volume |

| Table S1<br>Activity                                | Effect factor factor ( $\mu\text{DALY}/\mu\text{g}_{\text{intake}}$ ) |           |         |          |         |          |         |          |         |          |
|-----------------------------------------------------|-----------------------------------------------------------------------|-----------|---------|----------|---------|----------|---------|----------|---------|----------|
|                                                     | AC 0.2ACH                                                             | AC 0.6ACH | OA 3ACH | AO 14ACH | OB 3ACH | OB 14ACH | OD 3ACH | OD 14ACH | OA 3ACH | OA 14ACH |
| Candle burning (low)                                | 31.70                                                                 | 39.48     | 40.24   | 39.75    | 30.92   | 30.83    | 43.64   | 44.19    | 33.63   | 32.85    |
| Toasting/cooking electric (low)                     | 23.07                                                                 | 33.79     | 38.70   | 38.64    | 22.49   | 22.68    | 40.72   | 42.67    | 25.94   | 25.35    |
| Candle burning (medium)                             | 20.90                                                                 | 31.89     | 38.02   | 38.09    | 20.27   | 20.35    | 40.71   | 42.69    | 23.71   | 23.22    |
| Incense (low)                                       | 20.11                                                                 | 31.22     | 37.76   | 37.84    | 19.47   | 19.55    | 40.71   | 42.71    | 22.95   | 22.50    |
| Gas stove                                           | 17.10                                                                 | 28.48     | 36.53   | 36.71    | 16.44   | 16.51    | 40.68   | 42.75    | 19.96   | 19.62    |
| Printer (high)                                      | 15.92                                                                 | 27.36     | 35.90   | 36.58    | 15.25   | 15.27    | 40.68   | 42.69    | 18.72   | 18.40    |
| Frying (low)                                        | 12.73                                                                 | 24.08     | 34.03   | 34.48    | 12.11   | 12.15    | 40.62   | 42.77    | 15.45   | 15.21    |
| Grilling (low)                                      | 10.25                                                                 | 21.23     | 32.08   | 32.61    | 9.69    | 9.73     | 40.57   | 42.78    | 12.75   | 12.57    |
| Smoking/Candle with eucalyptus oil diffusion (high) | 7.83                                                                  | 17.88     | 29.49   | 30.03    | 7.39    | 7.42     | 40.47   | 42.80    | 9.90    | 9.77     |
| Cookstove (low)                                     | 6.69                                                                  | 16.27     | 28.06   | 30.02    | 6.24    | 6.24     | 43.12   | 44.14    | 8.55    | 8.47     |
| Cooking (high, with burning)                        | 6.35                                                                  | 15.28     | 27.23   | 27.65    | 6.02    | 6.04     | 40.36   | 42.81    | 8.00    | 7.91     |
| Frying/grilling (high)                              | 4.41                                                                  | 10.19     | 22.00   | 22.31    | 4.25    | 4.25     | 39.95   | 42.82    | 5.24    | 5.19     |
| Wood heater                                         | 3.30                                                                  | 8.73      | 20.11   | 22.18    | 3.04    | 3.22     | 39.64   | 42.45    | 4.45    | 4.56     |
| Incense (high)                                      | 3.22                                                                  | 6.08      | 15.73   | 15.49    | 3.11    | 3.11     | 39.02   | 42.83    | 3.69    | 3.67     |
| Cookstove (average)                                 | 2.95                                                                  | 5.40      | 14.12   | 16.52    | 2.85    | 2.85     | 38.61   | 42.68    | 3.38    | 3.36     |
| Cookstove (high)                                    | 0.62                                                                  | 1.72      | 3.40    | 3.82     | 0.57    | 0.57     | 26.19   | 42.19    | 0.85    | 0.84     |

| Activity                                            | Characterisation factor ( $\mu\text{DALY}/\mu\text{g}_{\text{emitted}}$ ) |           |         |          |         |          |         |          |         |          |
|-----------------------------------------------------|---------------------------------------------------------------------------|-----------|---------|----------|---------|----------|---------|----------|---------|----------|
|                                                     | AC 0.2ACH                                                                 | AC 0.6ACH | OA 3ACH | AO 14ACH | OB 3ACH | OB 14ACH | OD 3ACH | OD 14ACH | OA 3ACH | OA 14ACH |
| Candle burning (low)                                | 3.43E-3                                                                   | 9.62E-4   | 1.94E-4 | 1.35E-4  | 3.68E-3 | 3.67E-3  | 2.73E-6 | 3.42E-8  | 2.52E-3 | 2.50E-3  |
| Toasting/cooking electric (low)                     | 2.55E-3                                                                   | 8.27E-4   | 1.87E-4 | 1.38E-4  | 2.75E-3 | 2.72E-3  | 2.56E-6 | 5.44E-8  | 1.95E-3 | 1.93E-3  |
| Candle burning (medium)                             | 2.28E-3                                                                   | 7.82E-4   | 1.84E-4 | 1.39E-4  | 2.43E-3 | 2.43E-3  | 2.55E-6 | 4.09E-8  | 1.78E-3 | 1.77E-3  |
| Incense (low)                                       | 2.20E-3                                                                   | 7.68E-4   | 1.84E-4 | 1.41E-4  | 2.34E-3 | 2.33E-3  | 2.55E-6 | 4.39E-8  | 1.72E-3 | 1.71E-3  |
| Gas stove                                           | 1.87E-3                                                                   | 7.04E-4   | 1.78E-4 | 1.45E-4  | 1.97E-3 | 1.97E-3  | 2.55E-6 | 4.64E-8  | 1.50E-3 | 1.49E-3  |
| Printer (high)                                      | 1.73E-3                                                                   | 6.68E-4   | 1.73E-4 | 1.27E-4  | 1.82E-3 | 1.82E-3  | 2.54E-6 | 3.46E-8  | 1.41E-3 | 1.40E-3  |
| Frying (low)                                        | 1.39E-3                                                                   | 5.96E-4   | 1.66E-4 | 1.40E-4  | 1.45E-3 | 1.45E-3  | 2.54E-6 | 4.42E-8  | 1.16E-3 | 1.16E-3  |
| Grilling (low)                                      | 1.12E-3                                                                   | 5.27E-4   | 1.57E-4 | 1.36E-4  | 1.16E-3 | 1.16E-3  | 2.54E-6 | 4.68E-8  | 9.58E-4 | 9.57E-4  |
| Smoking/Candle with eucalyptus oil diffusion (high) | 8.53E-4                                                                   | 4.45E-4   | 1.45E-4 | 1.30E-4  | 8.84E-4 | 8.83E-4  | 2.53E-6 | 4.78E-8  | 7.44E-4 | 7.44E-4  |
| Cookstove (low)                                     | 7.26E-4                                                                   | 3.96E-4   | 1.35E-4 | 1.02E-4  | 7.79E-4 | 7.78E-4  | 2.70E-6 | 3.37E-8  | 6.44E-4 | 6.45E-4  |
| Cooking (high, with burning)                        | 6.92E-4                                                                   | 3.81E-4   | 1.34E-4 | 1.24E-4  | 7.20E-4 | 7.19E-4  | 2.53E-6 | 4.98E-8  | 6.01E-4 | 6.02E-4  |
| Frying/grilling (high)                              | 4.80E-4                                                                   | 2.55E-4   | 1.08E-4 | 1.04E-4  | 5.06E-4 | 5.05E-4  | 2.50E-6 | 4.86E-8  | 3.93E-4 | 3.95E-4  |
| Wood heater                                         | 2.86E-4                                                                   | 2.14E-4   | 9.75E-5 | 8.08E-5  | 3.80E-4 | 4.00E-4  | 2.67E-6 | 3.89E-8  | 3.63E-4 | 3.51E-4  |
| Incense (high)                                      | 3.51E-4                                                                   | 1.53E-4   | 7.78E-5 | 7.87E-5  | 3.71E-4 | 3.70E-4  | 2.44E-6 | 5.27E-8  | 2.77E-4 | 2.80E-4  |
| Cookstove (average)                                 | 3.20E-4                                                                   | 1.32E-4   | 6.82E-5 | 5.75E-5  | 3.35E-4 | 3.35E-4  | 2.41E-6 | 3.45E-8  | 2.53E-4 | 2.56E-4  |
| Cookstove (high)                                    | 6.72E-5                                                                   | 4.20E-5   | 1.65E-5 | 1.36E-5  | 6.69E-5 | 6.68E-5  | 1.64E-6 | 3.43E-8  | 6.36E-5 | 6.38E-5  |

| Activity                                            | Impact score ( $\mu\text{DALY}/\text{d}$ ) |           |         |          |         |          |         |          |         |          |
|-----------------------------------------------------|--------------------------------------------|-----------|---------|----------|---------|----------|---------|----------|---------|----------|
|                                                     | AC 0.2ACH                                  | AC 0.6ACH | OA 3ACH | AO 14ACH | OB 3ACH | OB 14ACH | OD 3ACH | OD 14ACH | OA 3ACH | OA 14ACH |
| Candle burning (low)                                | 8.24E+0                                    | 2.31E+0   | 4.66E-1 | 3.25E-1  | 8.84E+0 | 8.81E+0  | 6.55E-3 | 8.20E-5  | 6.06E+0 | 6.00E+0  |
| Toasting/cooking electric (low)                     | 1.68E+1                                    | 5.46E+0   | 1.24E+0 | 9.08E-1  | 1.81E+1 | 1.79E+1  | 1.69E-2 | 3.59E-4  | 1.29E+1 | 1.27E+1  |
| Candle burning (medium)                             | 2.02E+1                                    | 6.95E+0   | 1.64E+0 | 1.23E+0  | 2.16E+1 | 2.15E+1  | 2.26E-2 | 3.63E-4  | 1.58E+1 | 1.57E+1  |
| Incense (low)                                       | 2.15E+1                                    | 7.52E+0   | 1.80E+0 | 1.38E+0  | 2.29E+1 | 2.29E+1  | 2.50E-2 | 4.30E-4  | 1.69E+1 | 1.68E+1  |
| Gas stove                                           | 2.69E+1                                    | 1.01E+1   | 2.57E+0 | 2.08E+0  | 2.84E+1 | 2.84E+1  | 3.67E-2 | 6.68E-4  | 2.16E+1 | 2.15E+1  |
| Printer (high)                                      | 2.92E+1                                    | 1.13E+1   | 2.93E+0 | 2.16E+0  | 3.08E+1 | 3.08E+1  | 4.31E-2 | 5.85E-4  | 2.38E+1 | 2.37E+1  |
| Frying (low)                                        | 3.58E+1                                    | 1.54E+1   | 4.30E+0 | 3.61E+0  | 3.74E+1 | 3.74E+1  | 6.57E-2 | 1.14E-3  | 3.00E+1 | 2.99E+1  |
| Grilling (low)                                      | 4.16E+1                                    | 1.96E+1   | 5.85E+0 | 5.07E+0  | 4.32E+1 | 4.31E+1  | 9.46E-2 | 1.74E-3  | 3.57E+1 | 3.56E+1  |
| Smoking/Candle with eucalyptus oil diffusion (high) | 4.86E+1                                    | 2.54E+1   | 8.25E+0 | 7.40E+0  | 5.04E+1 | 5.03E+1  | 1.44E-1 | 2.72E-3  | 4.24E+1 | 4.24E+1  |
| Cookstove (low)                                     | 5.23E+1                                    | 2.85E+1   | 9.74E+0 | 7.37E+0  | 5.61E+1 | 5.60E+1  | 1.94E-1 | 2.43E-3  | 4.63E+1 | 4.64E+1  |
| Cooking (high, with burning)                        | 5.52E+1                                    | 3.04E+1   | 1.07E+1 | 9.90E+0  | 5.75E+1 | 5.73E+1  | 2.02E-1 | 3.97E-3  | 4.80E+1 | 4.80E+1  |
| Frying/grilling (high)                              | 7.86E+1                                    | 4.17E+1   | 1.78E+1 | 1.70E+1  | 8.29E+1 | 8.27E+1  | 4.10E-1 | 7.96E-3  | 6.44E+1 | 6.47E+1  |
| Wood heater                                         | 6.11E+1                                    | 4.57E+1   | 2.08E+1 | 1.72E+1  | 8.11E+1 | 8.54E+1  | 5.71E-1 | 8.30E-3  | 7.76E+1 | 7.49E+1  |
| Incense (high)                                      | 1.31E+2                                    | 5.69E+1   | 2.90E+1 | 2.93E+1  | 1.38E+2 | 1.38E+2  | 9.10E-1 | 1.96E-2  | 1.03E+2 | 1.04E+2  |
| Cookstove (average)                                 | 1.52E+2                                    | 6.26E+1   | 3.23E+1 | 2.73E+1  | 1.59E+2 | 1.59E+2  | 1.14E+0 | 1.64E-2  | 1.20E+2 | 1.21E+2  |
| Cookstove (high)                                    | 4.84E+2                                    | 3.02E+2   | 1.19E+2 | 9.78E+1  | 4.81E+2 | 4.81E+2  | 1.18E+1 | 2.47E-1  | 4.58E+2 | 4.59E+2  |

| Activity                                            | Effect factor factor ( $\mu\text{DALY}/\mu\text{g}_{\text{intake}}$ ) |           |         |          |         |          |         |          |         |          |
|-----------------------------------------------------|-----------------------------------------------------------------------|-----------|---------|----------|---------|----------|---------|----------|---------|----------|
|                                                     | AC 0.2ACH                                                             | AC 0.6ACH | OA 3ACH | AO 14ACH | OB 3ACH | OB 14ACH | OD 3ACH | OD 14ACH | OA 3ACH | OA 14ACH |
| Candle burning (low)                                | 40.31                                                                 | 40.35     | 40.30   | 40.09    | 39.38   | 39.16    | 44.51   | 43.14    | 39.67   | 37.46    |
| Toasting/cooking electric (low)                     | 33.59                                                                 | 37.25     | 39.58   | 39.97    | 33.06   | 33.27    | 42.55   | 41.98    | 34.27   | 30.85    |
| Candle burning (medium)                             | 31.64                                                                 | 36.07     | 39.27   | 39.91    | 31.08   | 31.22    | 42.49   | 41.92    | 32.52   | 28.86    |
| Incense (low)                                       | 30.95                                                                 | 35.63     | 39.15   | 39.90    | 30.38   | 30.51    | 42.47   | 41.90    | 31.91   | 28.17    |
| Gas stove                                           | 28.14                                                                 | 33.72     | 38.53   | 39.77    | 27.55   | 27.65    | 42.34   | 41.79    | 29.35   | 25.39    |
| Printer (high)                                      | 26.96                                                                 | 32.82     | 38.14   | 39.62    | 26.35   | 26.42    | 42.31   | 41.83    | 28.22   | 24.19    |
| Frying (low)                                        | 23.68                                                                 | 30.24     | 37.10   | 39.40    | 23.06   | 23.12    | 42.05   | 41.59    | 25.13   | 20.95    |
| Grilling (low)                                      | 20.81                                                                 | 27.79     | 35.87   | 39.05    | 20.19   | 20.24    | 41.76   | 41.40    | 22.36   | 18.13    |
| Smoking/Candle with eucalyptus oil diffusion (high) | 17.46                                                                 | 24.74     | 34.05   | 38.46    | 16.85   | 16.89    | 41.28   | 41.08    | 19.07   | 14.89    |
| Cookstove (low)                                     | 15.60                                                                 | 23.05     | 32.96   | 37.57    | 14.92   | 14.92    | 44.55   | 42.05    | 17.33   | 13.21    |
| Cooking (high, with burning)                        | 14.87                                                                 | 22.22     | 32.34   | 37.82    | 14.28   | 14.31    | 40.76   | 40.73    | 16.48   | 12.44    |
| Frying/grilling (high)                              | 9.87                                                                  | 16.72     | 27.94   | 35.79    | 9.39    | 9.41     | 39.04   | 39.60    | 11.25   | 8.01     |
| Wood heater                                         | 7.01                                                                  | 14.72     | 26.23   | 34.10    | 6.58    | 6.91     | 42.73   | 39.21    | 9.56    | 6.68     |
| Incense (high)                                      | 5.92                                                                  | 10.80     | 22.06   | 32.11    | 5.66    | 5.67     | 35.79   | 37.25    | 6.73    | 4.98     |
| Cookstove (average)                                 | 5.21                                                                  | 9.31      | 20.42   | 29.90    | 5.01    | 5.01     | 42.78   | 36.65    | 5.84    | 4.46     |
| Cookstove (high)                                    | 1.66                                                                  | 2.58      | 4.75    | 10.58    | 1.59    | 1.59     | 42.73   | 19.06    | 1.84    | 1.38     |

| Activity                                            | Characterisation factor ( $\mu\text{DALY}/\mu\text{g}_{\text{emitted}}$ ) |           |         |          |         |          |         |          |         |          |
|-----------------------------------------------------|---------------------------------------------------------------------------|-----------|---------|----------|---------|----------|---------|----------|---------|----------|
|                                                     | AC 0.2ACH                                                                 | AC 0.6ACH | OA 3ACH | AO 14ACH | OB 3ACH | OB 14ACH | OD 3ACH | OD 14ACH | OA 3ACH | OA 14ACH |
| Candle burning (low)                                | 1.06E-3                                                                   | 4.01E-4   | 8.38E-5 | 1.78E-5  | 1.12E-3 | 1.12E-3  | 1.23E-5 | 7.13E-6  | 8.40E-4 | 1.37E-3  |
| Toasting/cooking electric (low)                     | 8.95E-4                                                                   | 3.70E-4   | 8.27E-5 | 1.78E-5  | 9.52E-4 | 9.50E-4  | 1.18E-5 | 6.99E-6  | 7.26E-4 | 1.13E-3  |
| Candle burning (medium)                             | 8.36E-4                                                                   | 3.58E-4   | 8.22E-5 | 1.78E-5  | 8.89E-4 | 8.90E-4  | 1.17E-5 | 7.01E-6  | 6.89E-4 | 1.05E-3  |
| Incense (low)                                       | 8.18E-4                                                                   | 3.54E-4   | 8.21E-5 | 1.79E-5  | 8.69E-4 | 8.70E-4  | 1.17E-5 | 7.04E-6  | 6.76E-4 | 1.03E-3  |
| Gas stove                                           | 7.44E-4                                                                   | 3.35E-4   | 8.11E-5 | 1.79E-5  | 7.88E-4 | 7.89E-4  | 1.17E-5 | 7.08E-6  | 6.22E-4 | 9.27E-4  |
| Printer (high)                                      | 7.10E-4                                                                   | 3.26E-4   | 7.95E-5 | 1.76E-5  | 7.52E-4 | 7.53E-4  | 1.17E-5 | 6.94E-6  | 5.98E-4 | 8.83E-4  |
| Frying (low)                                        | 6.25E-4                                                                   | 3.00E-4   | 7.83E-5 | 1.78E-5  | 6.58E-4 | 6.59E-4  | 1.16E-5 | 7.08E-6  | 5.32E-4 | 7.65E-4  |
| Grilling (low)                                      | 5.49E-4                                                                   | 2.76E-4   | 7.58E-5 | 1.76E-5  | 5.77E-4 | 5.77E-4  | 1.15E-5 | 7.08E-6  | 4.74E-4 | 6.62E-4  |
| Smoking/Candle with eucalyptus oil diffusion (high) | 4.61E-4                                                                   | 2.46E-4   | 7.21E-5 | 1.74E-5  | 4.81E-4 | 4.81E-4  | 1.14E-5 | 7.05E-6  | 4.04E-4 | 5.44E-4  |
| Cookstove (low)                                     | 4.18E-4                                                                   | 2.29E-4   | 6.86E-5 | 1.98E-5  | 4.35E-4 | 4.35E-4  | 1.23E-5 | 6.95E-6  | 3.67E-4 | 4.83E-4  |
| Cooking (high, with burning)                        | 3.93E-4                                                                   | 2.21E-4   | 6.86E-5 | 1.72E-5  | 4.08E-4 | 4.08E-4  | 1.12E-5 | 7.02E-6  | 3.49E-4 | 4.54E-4  |
| Frying/grilling (high)                              | 2.60E-4                                                                   | 1.66E-4   | 5.94E-5 | 1.63E-5  | 2.68E-4 | 2.68E-4  | 1.08E-5 | 6.86E-6  | 2.38E-4 | 2.92E-4  |
| Wood heater                                         | 2.43E-4                                                                   | 1.46E-4   | 5.48E-5 | 1.81E-5  | 2.53E-4 | 2.45E-4  | 1.30E-5 | 6.56E-6  | 2.02E-4 | 2.50E-4  |
| Incense (high)                                      | 1.56E-4                                                                   | 1.07E-4   | 4.71E-5 | 1.47E-5  | 1.61E-4 | 1.61E-4  | 9.87E-6 | 6.51E-6  | 1.43E-4 | 1.82E-4  |
| Cookstove (average)                                 | 1.37E-4                                                                   | 9.25E-5   | 4.26E-5 | 1.58E-5  | 1.42E-4 | 1.42E-4  | 1.18E-5 | 6.08E-6  | 1.24E-4 | 1.63E-4  |
| Cookstove (high)                                    | 4.34E-5                                                                   | 2.56E-5   | 9.91E-6 | 5.60E-6  | 4.50E-5 | 4.50E-5  | 1.18E-5 | 3.18E-6  | 3.90E-5 | 5.04E-5  |

| Activity                                            | Impact score ( $\mu\text{DALY}/\text{d}$ ) |           |         |          |         |          |         |          |         |          |
|-----------------------------------------------------|--------------------------------------------|-----------|---------|----------|---------|----------|---------|----------|---------|----------|
|                                                     | AC 0.2ACH                                  | AC 0.6ACH | OA 3ACH | AO 14ACH | OB 3ACH | OB 14ACH | OD 3ACH | OD 14ACH | OA 3ACH | OA 14ACH |
| Candle burning (low)                                | 2.55                                       | 0.96      | 0.20    | 0.04     | 2.70    | 2.68     | 0.03    | 0.02     | 2.02    | 3.28     |
| Toasting/cooking electric (low)                     | 5.91                                       | 2.44      | 0.55    | 0.12     | 6.28    | 6.27     | 0.08    | 0.05     | 4.79    | 7.44     |
| Candle burning (medium)                             | 7.43                                       | 3.18      | 0.73    | 0.16     | 7.89    | 7.91     | 0.10    | 0.06     | 6.12    | 9.36     |
| Incense (low)                                       | 8.02                                       | 3.47      | 0.80    | 0.18     | 8.52    | 8.53     | 0.11    | 0.07     | 6.62    | 10.08    |
| Gas stove                                           | 10.72                                      | 4.82      | 1.17    | 0.26     | 11.35   | 11.35    | 0.17    | 0.10     | 8.95    | 13.35    |
| Printer (high)                                      | 12.02                                      | 5.51      | 1.34    | 0.30     | 12.72   | 12.74    | 0.20    | 0.12     | 10.11   | 14.94    |
| Frying (low)                                        | 16.15                                      | 7.76      | 2.02    | 0.46     | 17.01   | 17.03    | 0.30    | 0.18     | 13.76   | 19.77    |
| Grilling (low)                                      | 20.45                                      | 10.27     | 2.82    | 0.66     | 21.46   | 21.47    | 0.43    | 0.26     | 17.63   | 24.65    |
| Smoking/Candle with eucalyptus oil diffusion (high) | 26.27                                      | 14.00     | 4.11    | 0.99     | 27.42   | 27.42    | 0.65    | 0.40     | 23.02   | 30.98    |
| Cookstove (low)                                     | 30.09                                      | 16.48     | 4.94    | 1.42     | 31.34   | 31.29    | 0.89    | 0.50     | 26.42   | 34.76    |
| Cooking (high, with burning)                        | 31.33                                      | 17.60     | 5.48    | 1.37     | 32.54   | 32.54    | 0.90    | 0.56     | 27.84   | 36.23    |
| Frying/grilling (high)                              | 42.61                                      | 27.19     | 9.73    | 2.67     | 43.87   | 43.87    | 1.76    | 1.12     | 39.02   | 47.88    |
| Wood heater                                         | 51.90                                      | 31.20     | 11.71   | 3.86     | 54.00   | 52.38    | 2.79    | 1.40     | 43.25   | 53.33    |
| Incense (high)                                      | 58.13                                      | 39.96     | 17.55   | 5.48     | 60.16   | 60.13    | 3.68    | 2.43     | 53.11   | 67.72    |
| Cookstove (average)                                 | 64.80                                      | 43.82     | 20.18   | 7.48     | 67.38   | 67.37    | 5.58    | 2.88     | 58.62   | 77.21    |
| Cookstove (high)                                    | 312.57                                     | 184.34    | 71.35   | 40.30    | 324.31  | 324.27   | 84.70   | 22.87    | 281.04  | 362.77   |
